# Supplementary material for: Conductive chromotropic fiber filament sensors with ultrahigh stretchability for wearable sensing textiles toward 3D optical motion capture
Source: Royal Society of Chemistry journal article supplement (doi:10.1039/d3ta01359f), 2023-01-01
Supplement: d3ta01359f4.pdf [file d3ta01359f4.pdf]

## Supporting Information

# Conductive Chromotropic Fiber Filament Sensors with Ultrahigh Stretchability for Wearable Sensing Textiles Toward 3D Optical Motion Capture†

Yufei Guo,<sup>a</sup> Yongshi Guo,<sup>a</sup> Jiawei Wu,<sup>a</sup> Liying Wei,<sup>a</sup> Shuhui Xia,<sup>a</sup> Chuang Zhu<sup>\*a</sup> and Jianhua Yan<sup>\*a</sup>

<sup>a</sup>Key Laboratory of Textile Science & Technology, Ministry of Education, College of Textiles, Donghua University, Shanghai 201620, China.

E-mail: [chuang.zhu@dhu.edu.cn](mailto:chuang.zhu@dhu.edu.cn); [yanjianhua@dhu.edu.cn](mailto:yanjianhua@dhu.edu.cn)

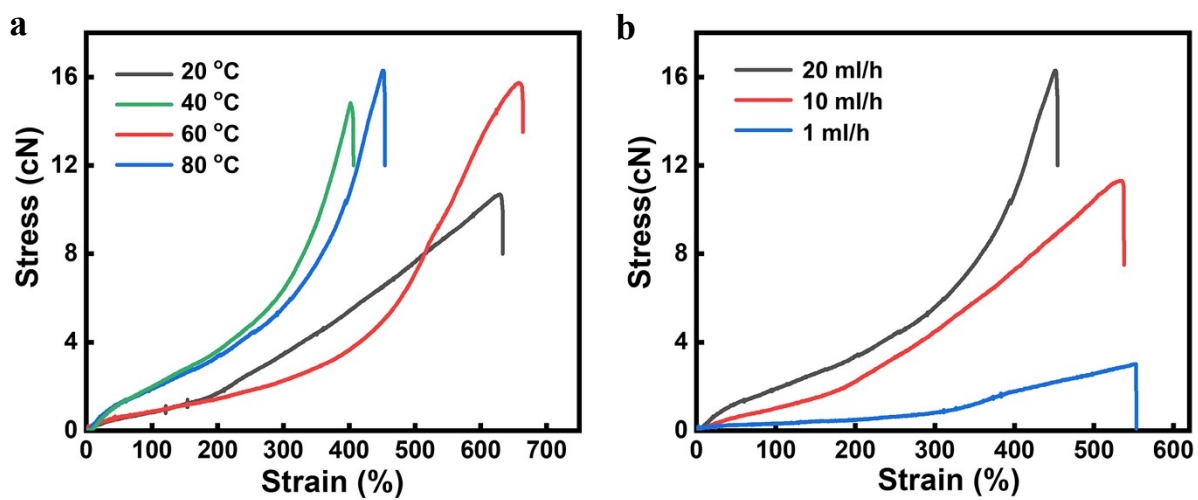

**Fig. S1** Tensile properties at break of the pure Ecoflex fibers that were fabricated (a) at different coagulation bath temperatures or (b) with different extrusion speeds at a constant coagulation bath temperature of 80 °C.

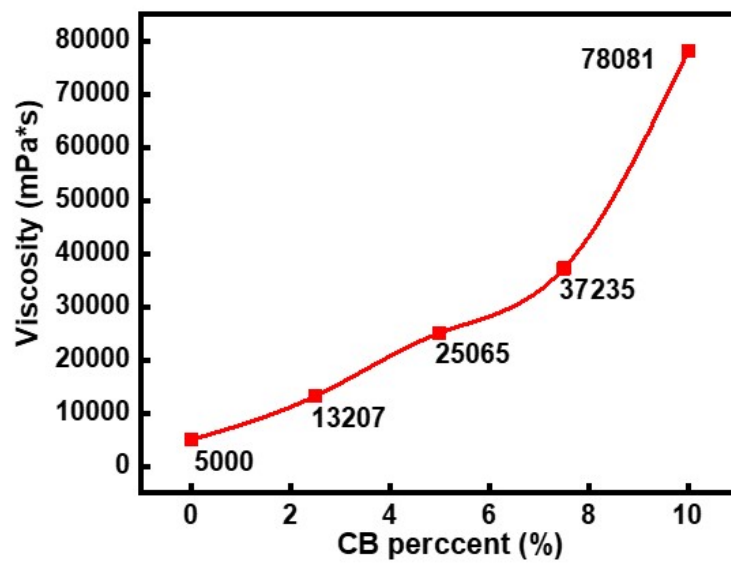

**Fig. S2** Mixed viscosity of the as-prepared spinning solution with different CB doping amount. With the increase of CB content, the mixing viscosity of spinning solution increased in a polynomial form.

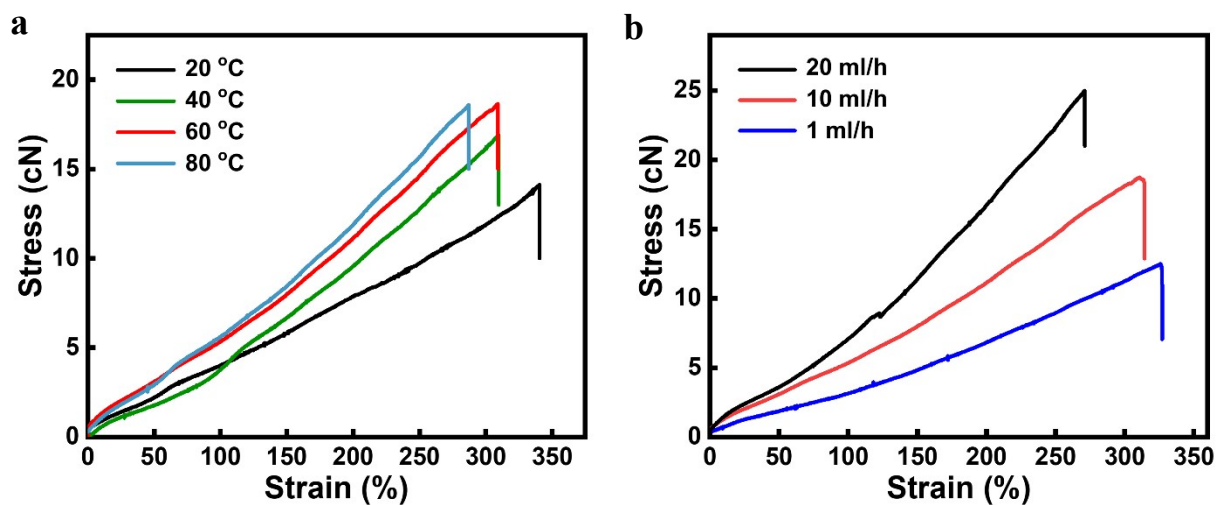

**Fig. S3** Tensile properties at break of the composite Ecoflex/CB fibers with 7.5 wt.% of CB NPs that fabricated (a) at different coagulation bath temperatures or (b) with different extrusion speeds at a constant coagulation bath temperature of 60 °C.

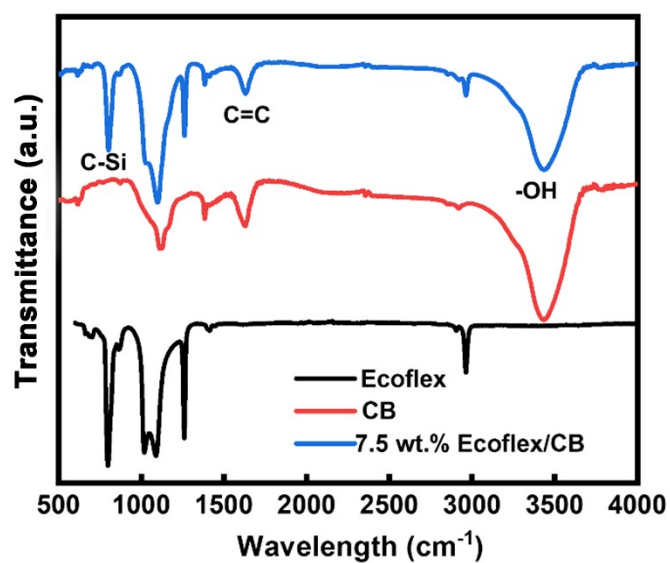

**Fig. S4** FTIR spectra of the as-fabricated pure Ecoflex fibers, CB NPs, and the composite Ecoflex/CB fibers with 7.5 wt.% of CB NPs.

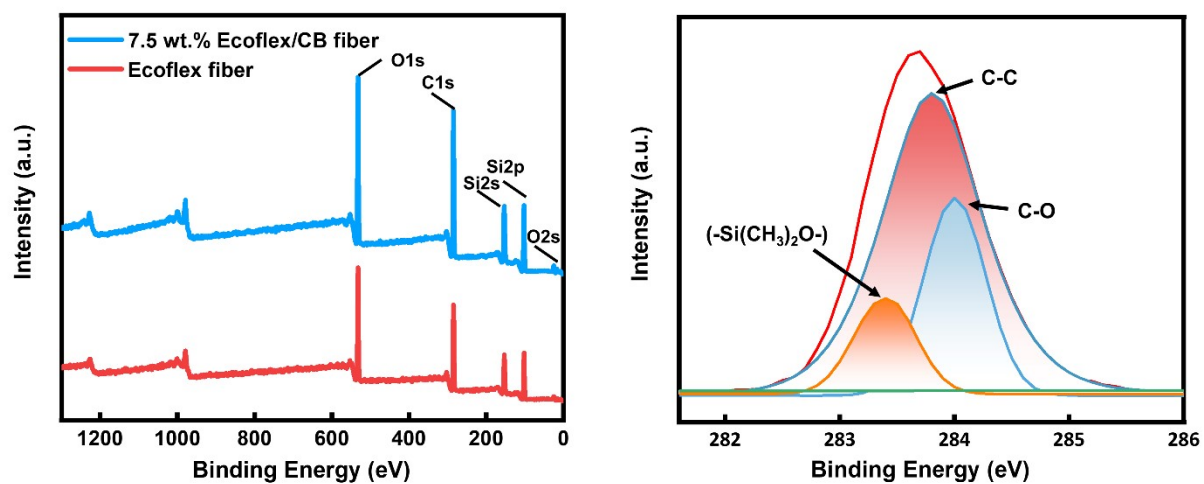

**Fig. S5** XPS spectra of the as-fabricated pure Ecoflex fibers and the composite Ecoflex/CB fibers with 7.5 wt.% of CB NPs, and C 1s in the pure Ecoflex fibers.

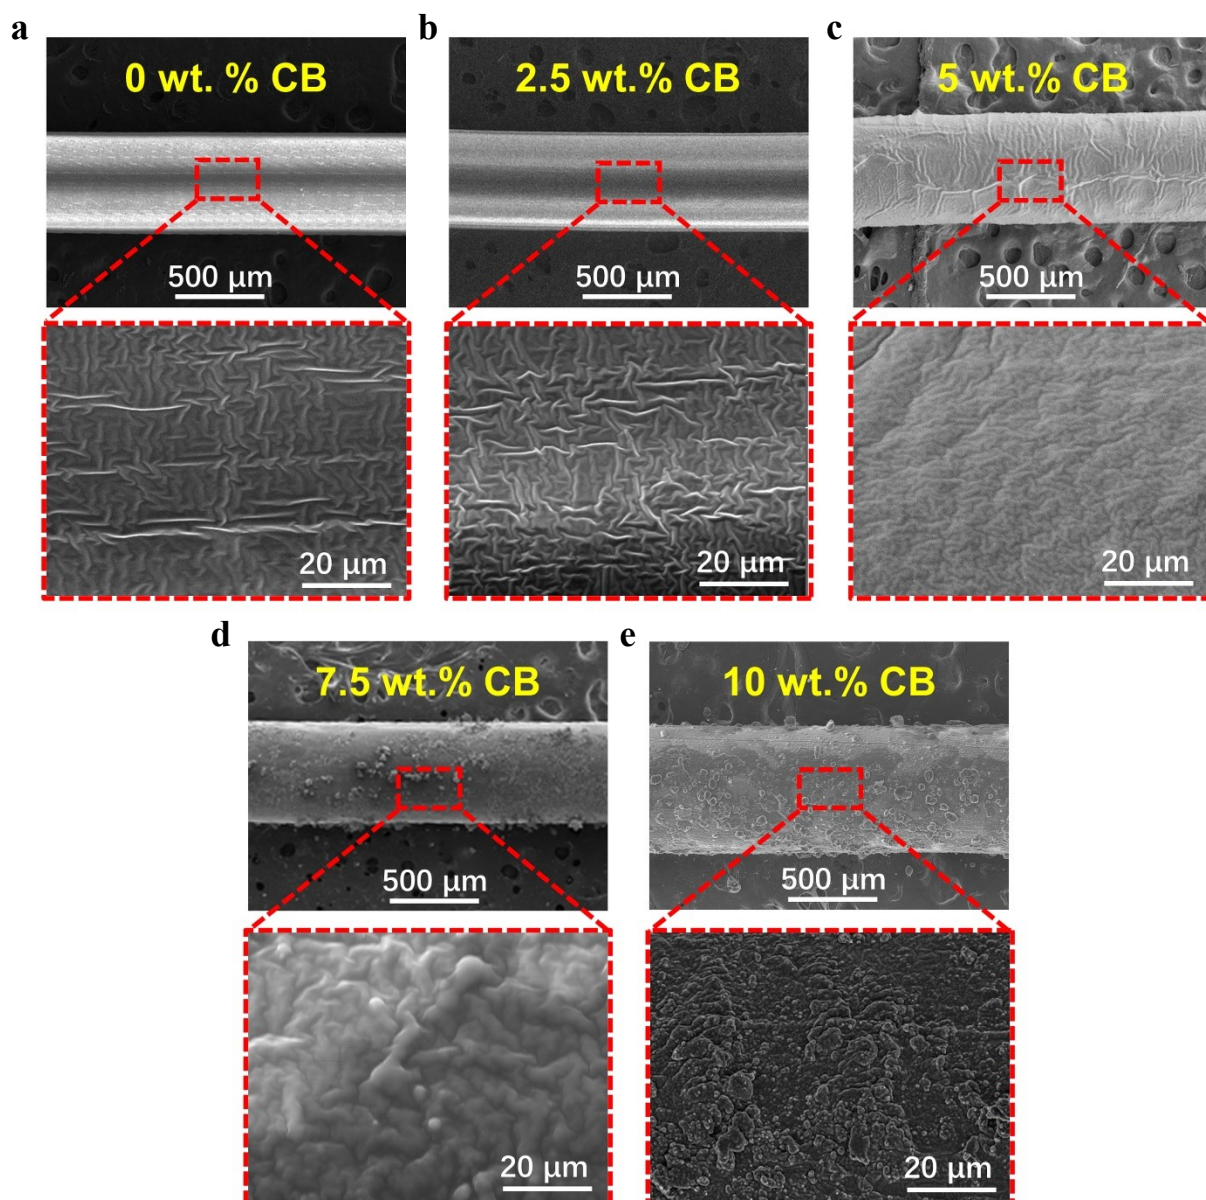

**Fig. S6** SEM images with two different magnifications of the as-fabricated composite fibers that contained different contents of CB NPs. (a) 0 wt.%, (b) 2.5 wt.%, (c) 5 wt.%, (d) 7.5 wt.%, (e) 10 wt.%.

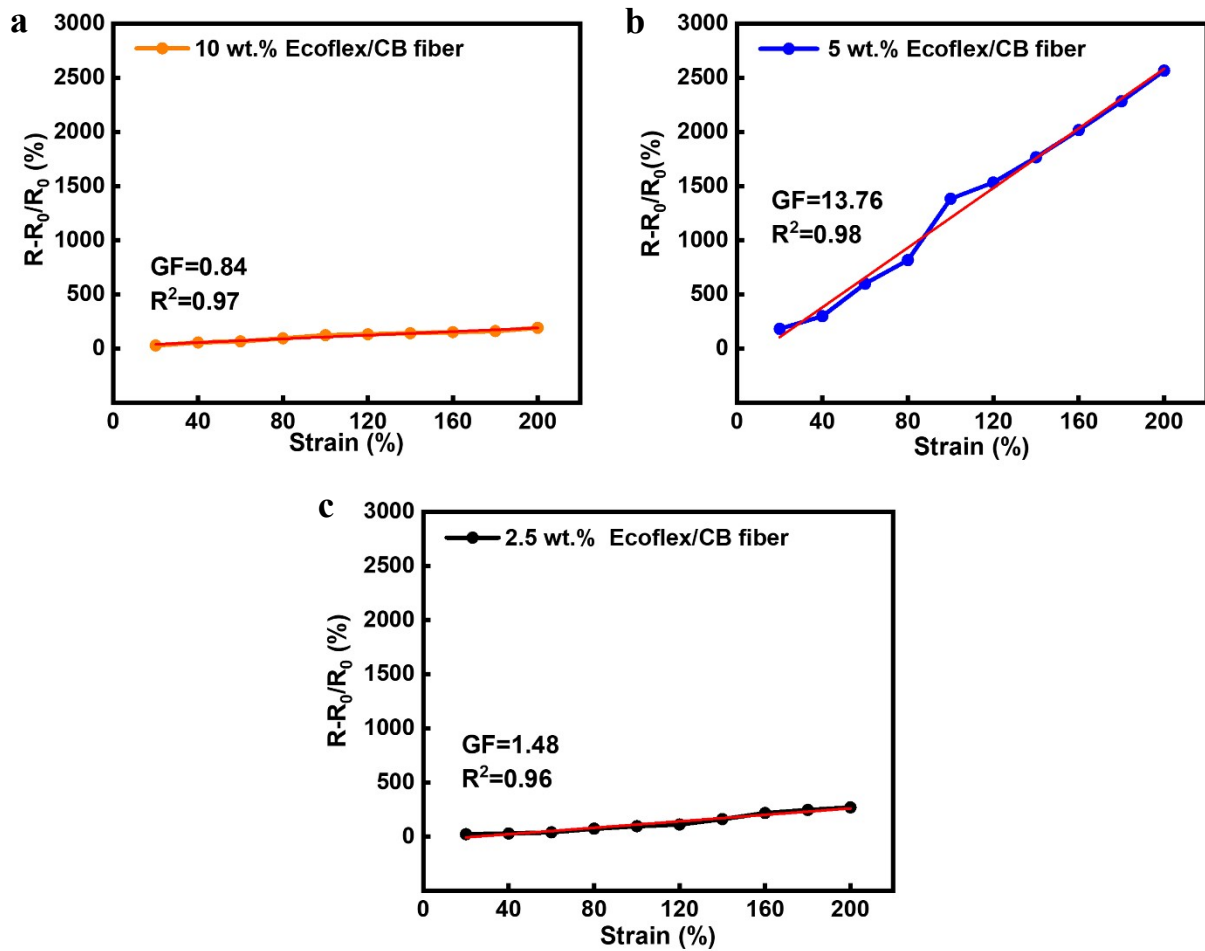

**Figure S7.** The resistance change rate (GF) of the as-fabricated different composite fibers during stretching and their linear regression correlation coefficient ( $R^2$ ). The contents of CB NPs in the composite fibers are (a) 10 wt.%, (b) 5 wt.%, (c) 2.5 wt.%. The value of GF can be calculated by  $GF=(R-R_0)*L/R_0*\Delta L$ .

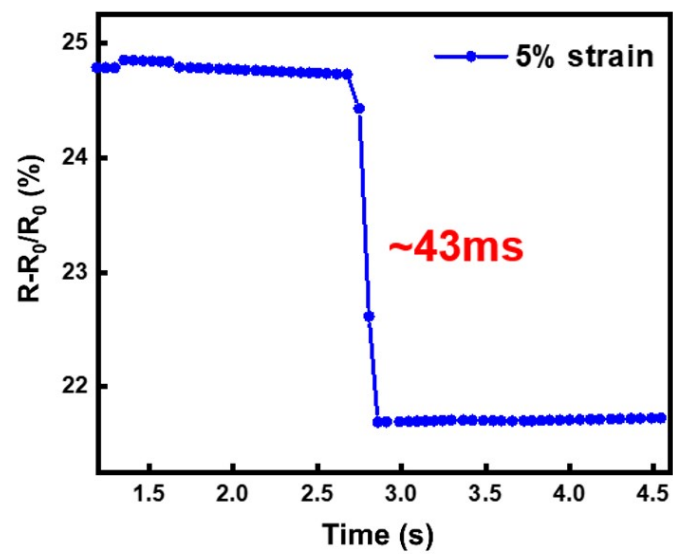

**Fig. S8** The electrical signal obtained by applying a quasi-release step strain of 5% at a speed of 40 mm/s showing a fast response time of 43 ms.



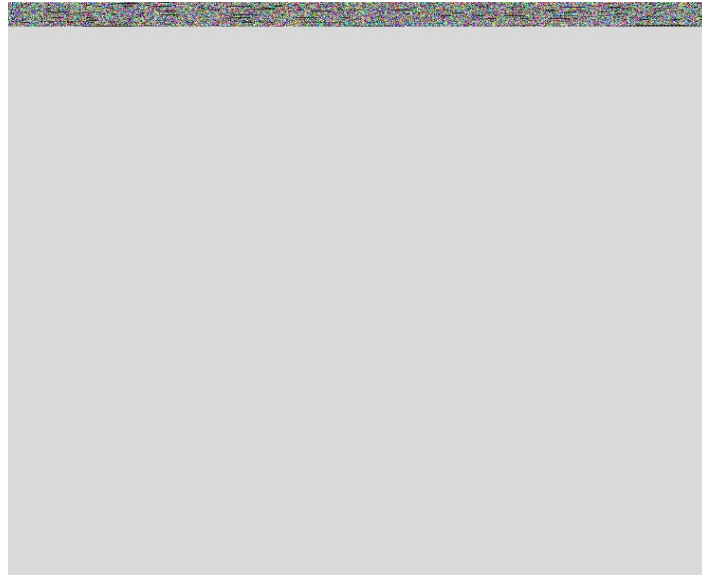

**Fig. S9** Resistance change rate of the composite Ecoflex/CB fiber sensors with 7.5 wt.% of CB NPs under different stretching degrees.

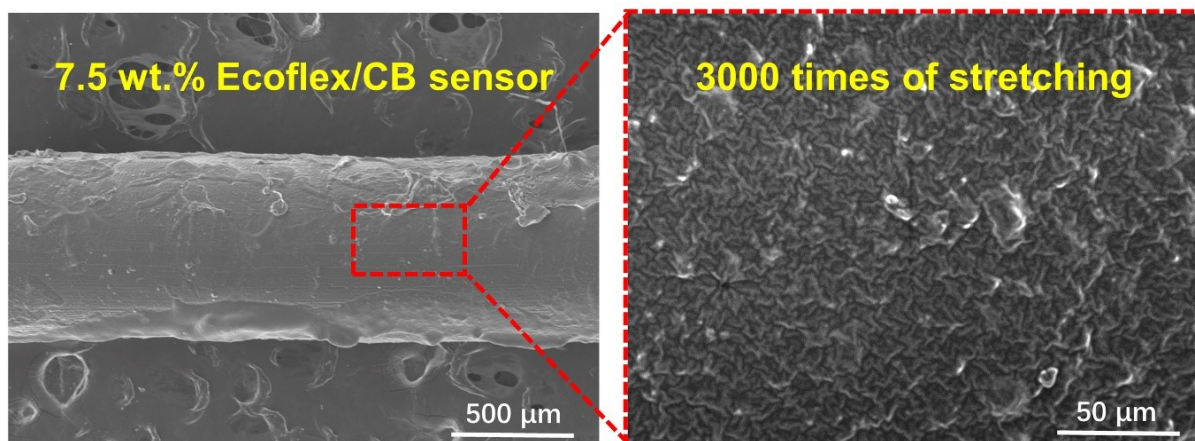

**Fig. S10** Different magnification SEM images of the composite Ecoflex/CB fiber sensors with 7.5 wt.% of CB NPs after 3000 times of stretching.

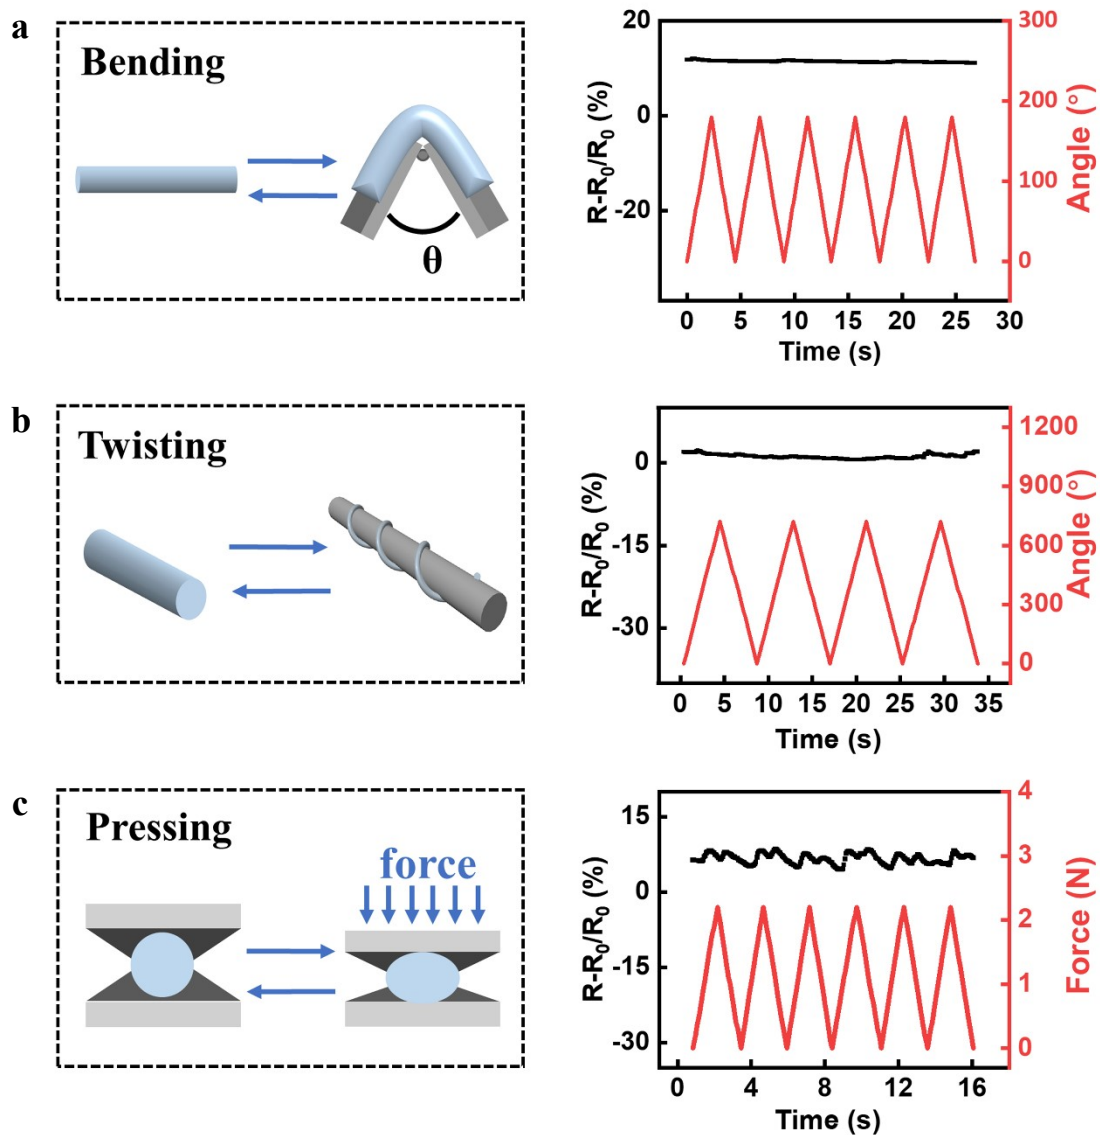

**Fig. S11** The relative electrical changes of the composite Ecoflex/CB fiber sensors with 7.5 wt.% of CB NPs under (a) bending, (b) torsion and (c) pressurization. The stable performance under these three different conditions indicated that the sensors had anti-interference performance to mechanical stimulation.

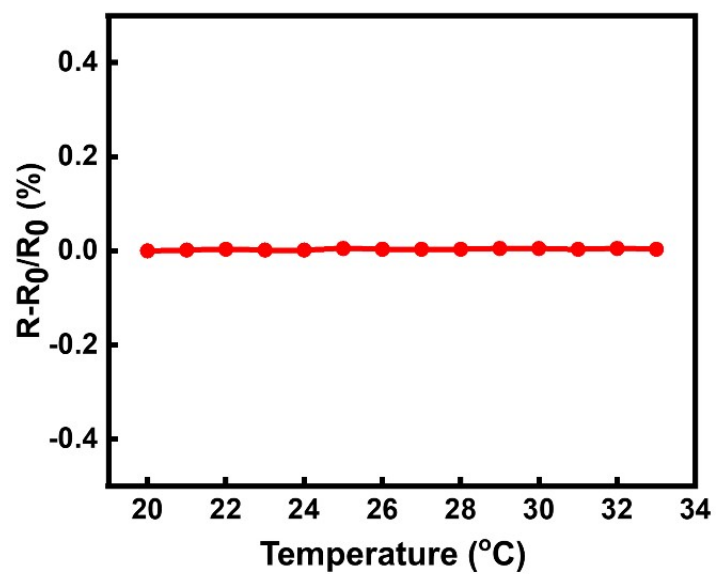

**Fig. S12** The composite Ti@Ecoflex/CB fiber sensors with 7.5 wt.% of CB NPs show strong resistance stability in the working temperature range of 18-33 °C.

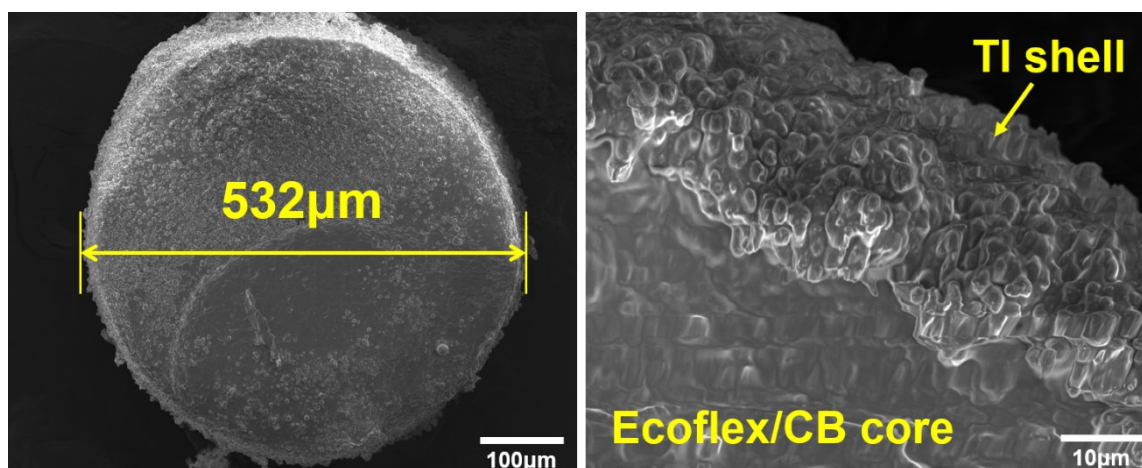

**Fig. S13** The diameter of TI@Ecoflex/CB fiber filament sensor was 532  $\mu\text{m}$  with the microstructure of TI shell and Ecoflex/CB core.

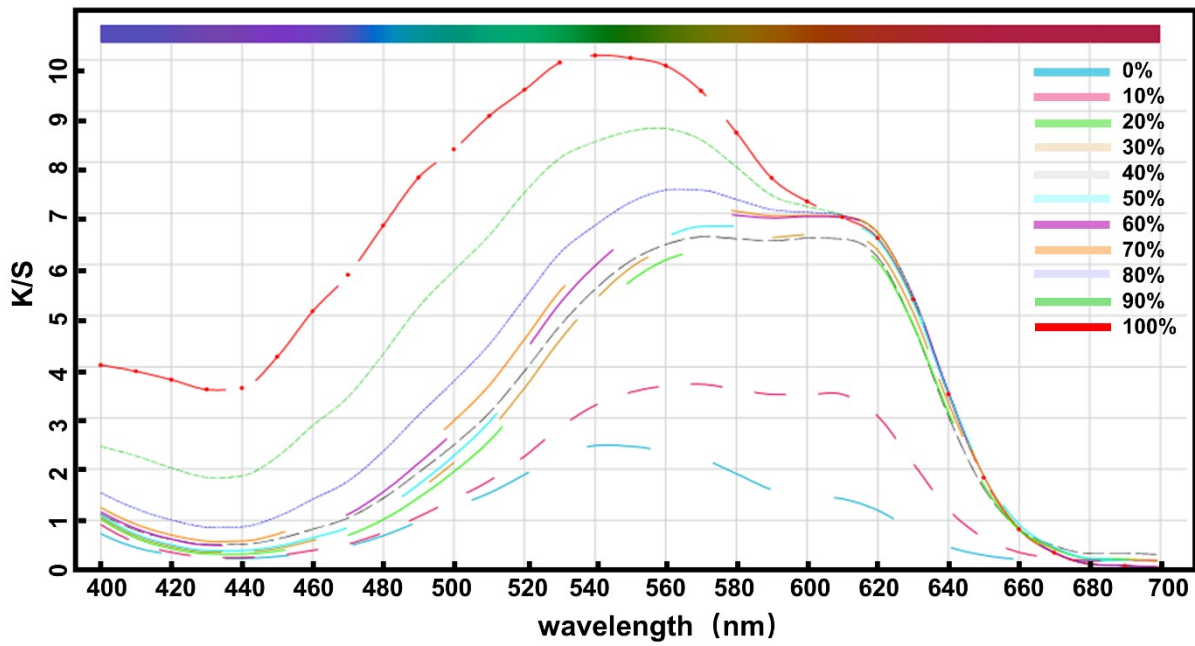

**Fig. S14** K/S curve of the composite Ti@Ecoflex/CB fiber sensors with 7.5 wt.% of CB NPs under strain changes from 0% to 100% at an ambient temperature of 16 °C.

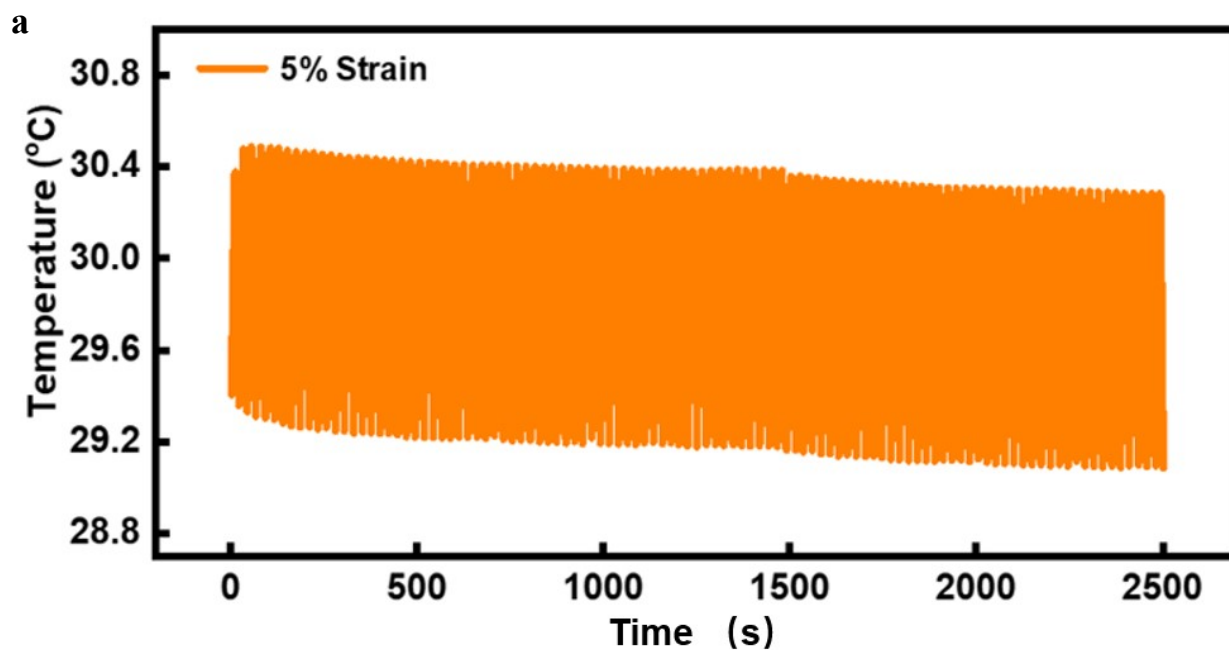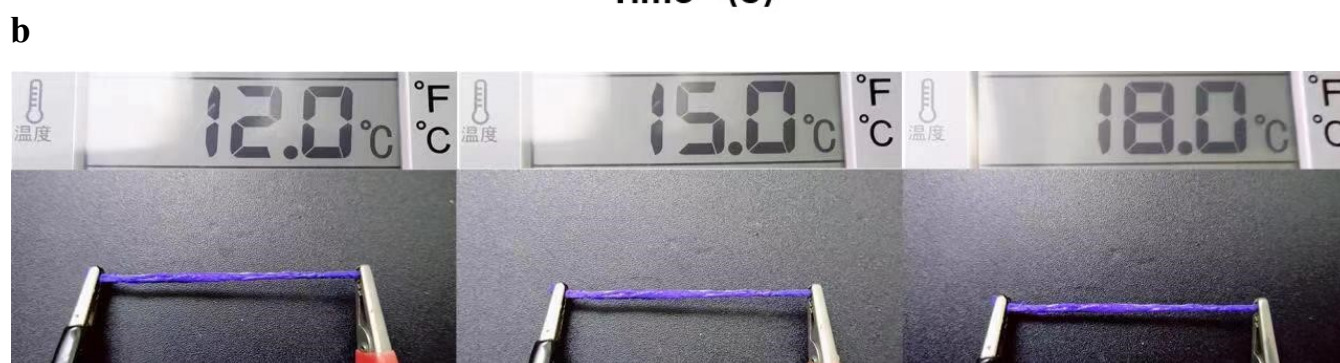

**Fig. S15.** Temperature of the composite Ti@Ecoflex/CB fiber sensors with 7.5 wt.% of CB NPs with 5% cyclic strain applied at an ambient temperature of 16 °C and 3000 cycles (**a**), and 50% stretching exhibits the same color at different ambient temperatures (**b**).

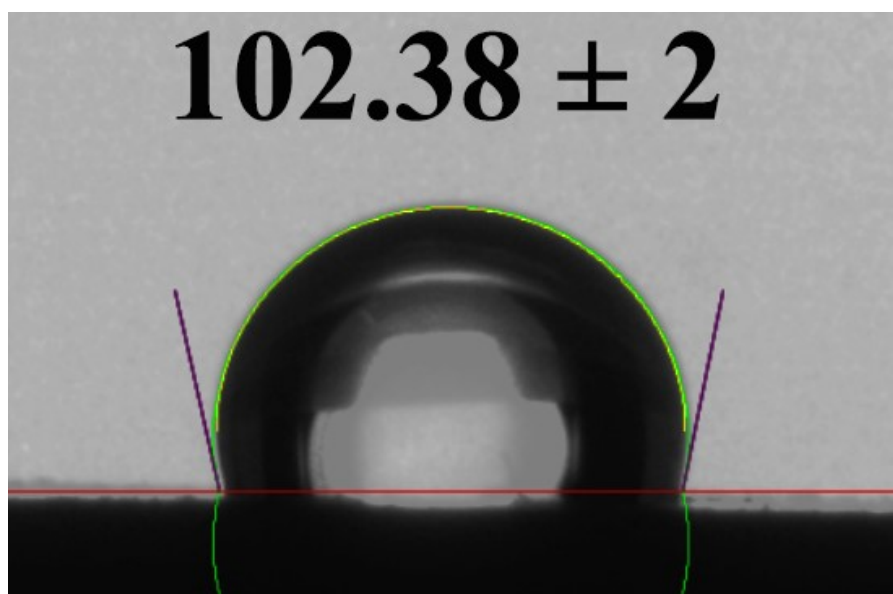

**Fig. S16** The contact angle of the composite Ti@Ecoflex/CB fiber sensors with 7.5 wt.% of CB NPs, exhibiting extreme hydrophobicity.



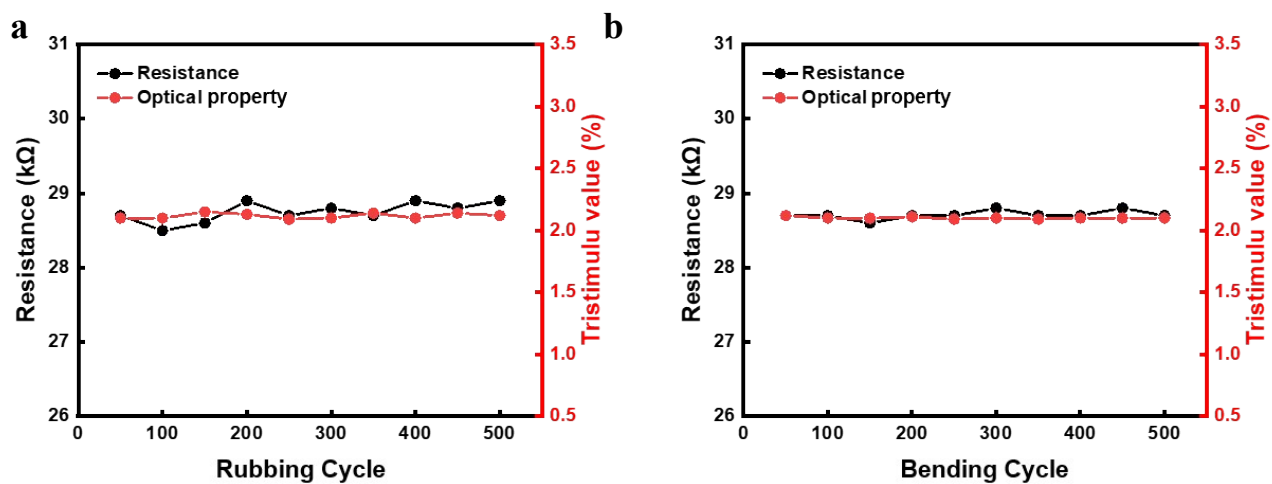

**Fig. S17** The stability test of TI@Ecoflex/CB fiber sensors under rubbing (**a**) and bending (**b**) at the wavelength of 540 nm for tristimulu value.

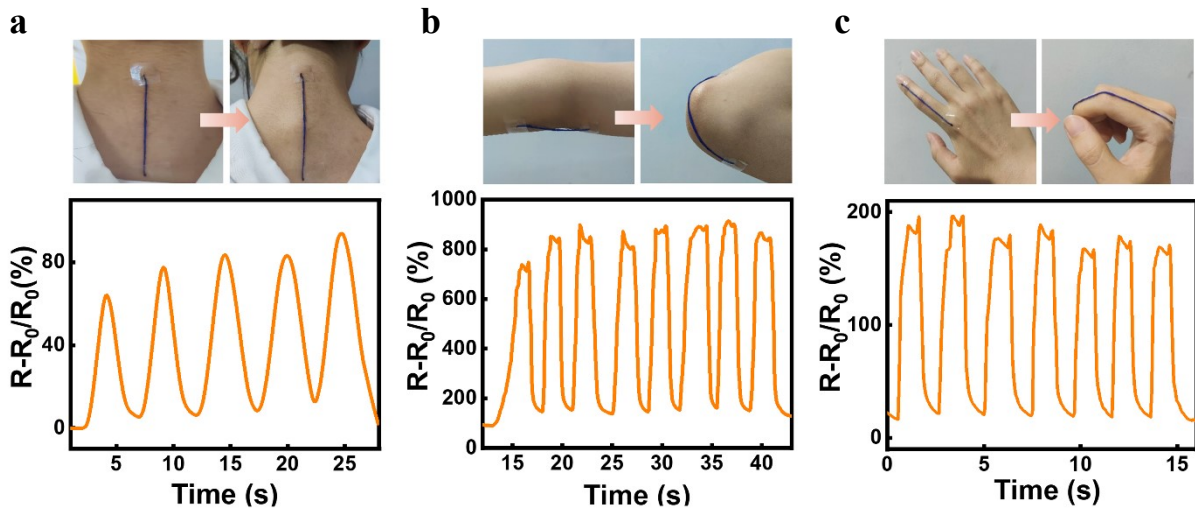

**Fig. S18** Resistance change diagram of the composite Ti@Ecoflex/CB fiber sensors with 7.5 wt.% of CB NPs for (a) cervical vertebra bending test, (b) elbow joint bending test and (c) finger joint bending test.

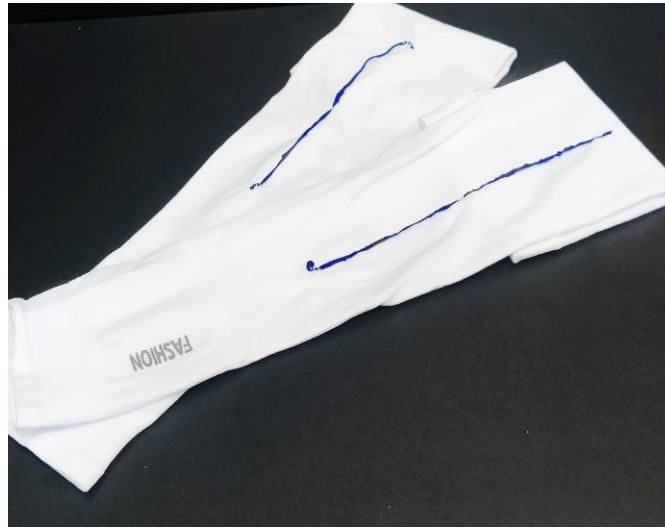

**Fig. S19** A wearable intelligent sensing arm guard model for 3D motion capture prepared in this paper.

---

**Movie S1:** Wet-spinning process for the continuous fabrication of Ecoflex/CB fibers.

**Movie S2:** Demonstration of the color changes of the composite Ti@Ecoflex/CB fiber sensors with 7.5 wt.% of CB NPs during strain variations from 0% to 100%.

**Movie S3:** Dynamic capture of badminton players' motion by the composite Ti@Ecoflex/CB fiber sensors with 7.5 wt.% of CB NPs.
